# Supplementary material for: Blood Cell Biomarkers of Inflammation and Cytokine Levels as Predictors of Response to Biologics in Patients with Psoriasis
Source: MDPI journal article supplement (doi:10.3390/ijms24076111), 2023-03-24

**Figure S1:** Overview of included patients and treatment series in the analysis of blood cell biomarkers

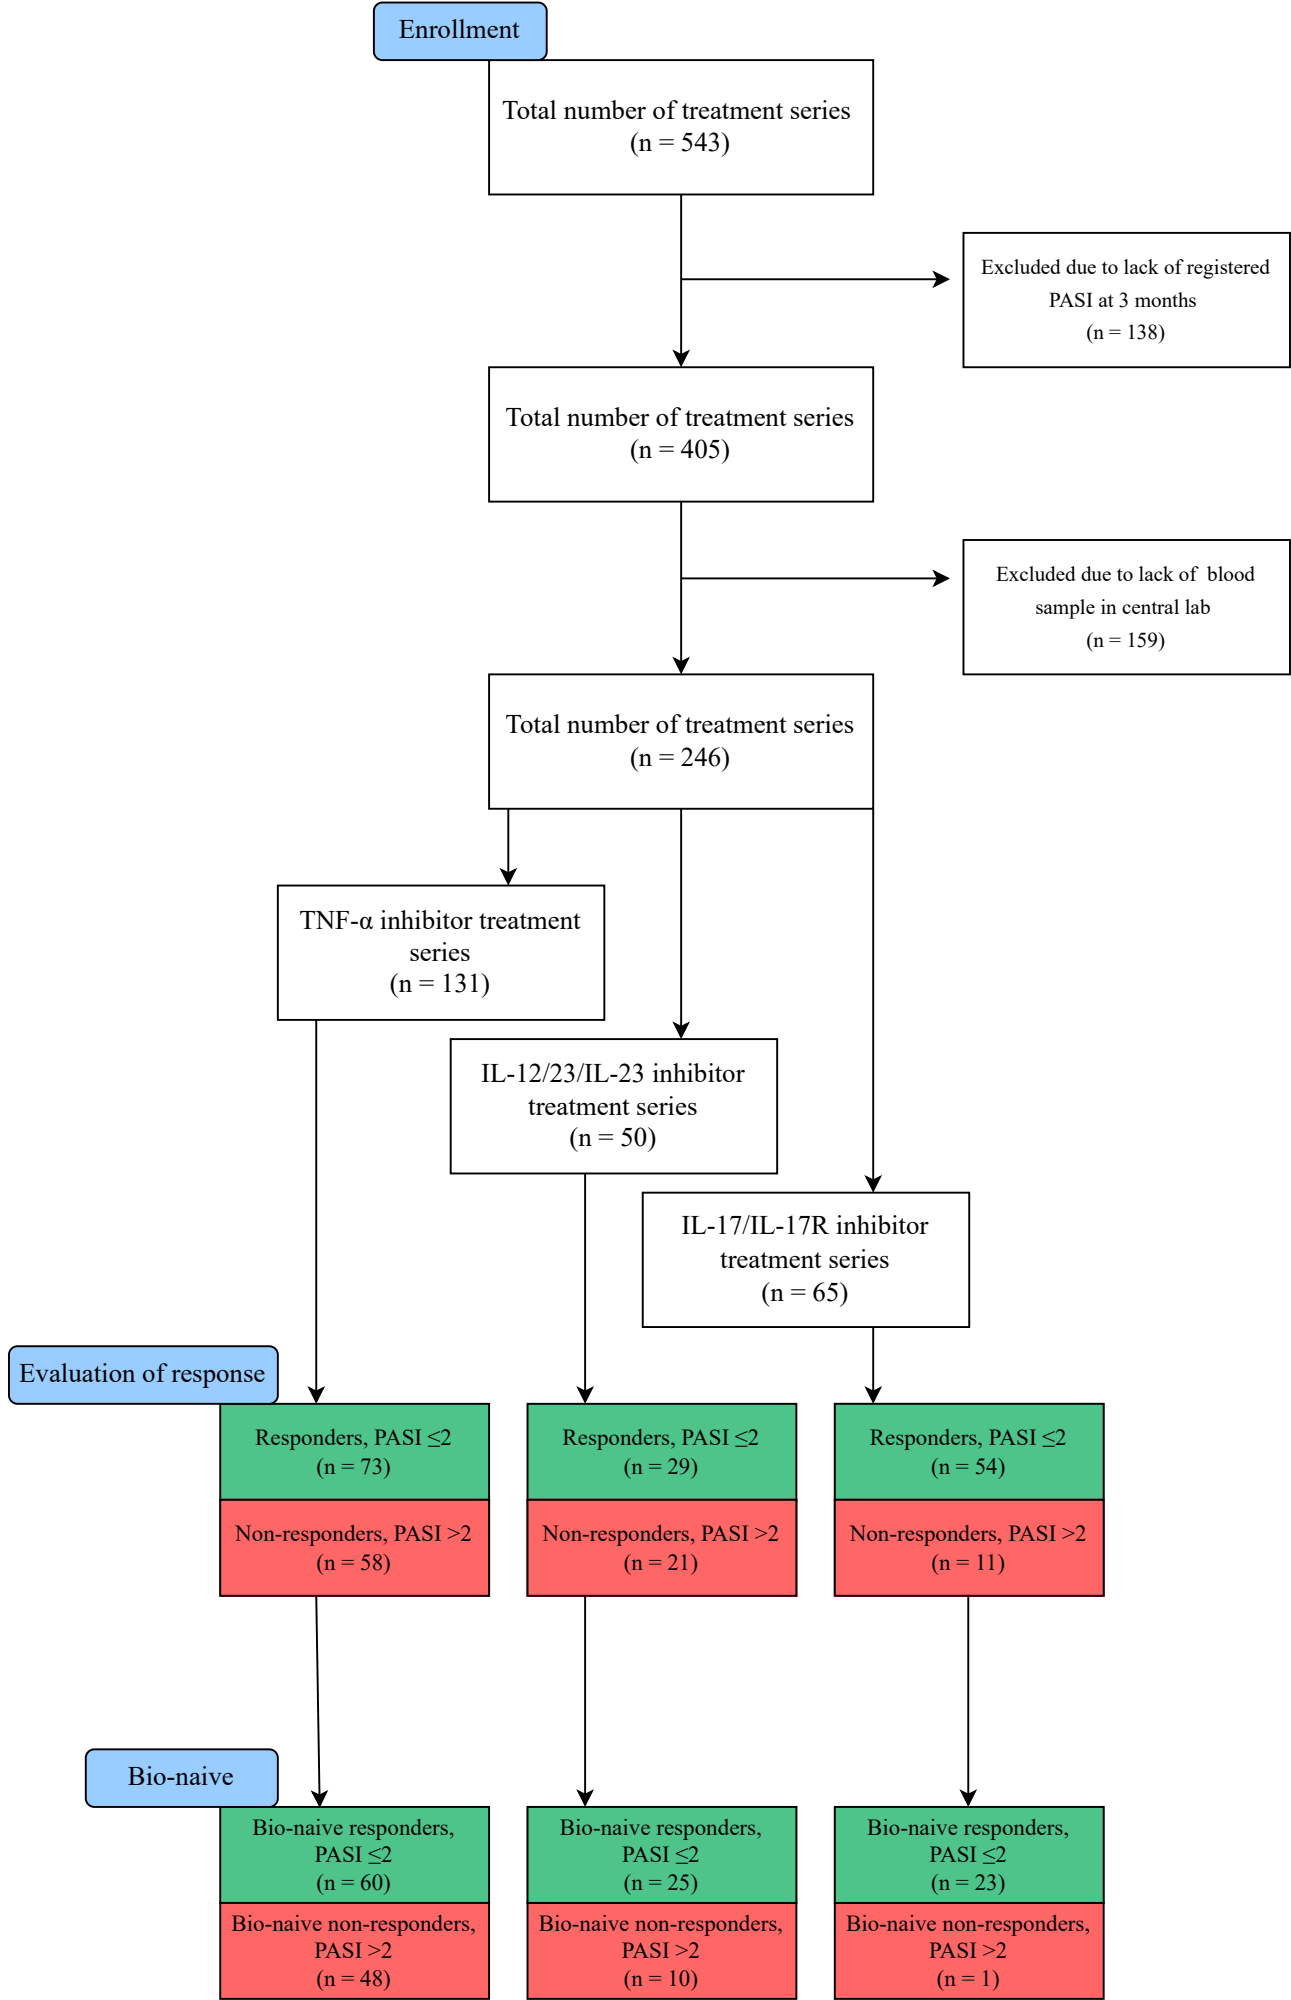

**Figure S2:** Overview of included patients and treatment series in the analysis of blood cytokines

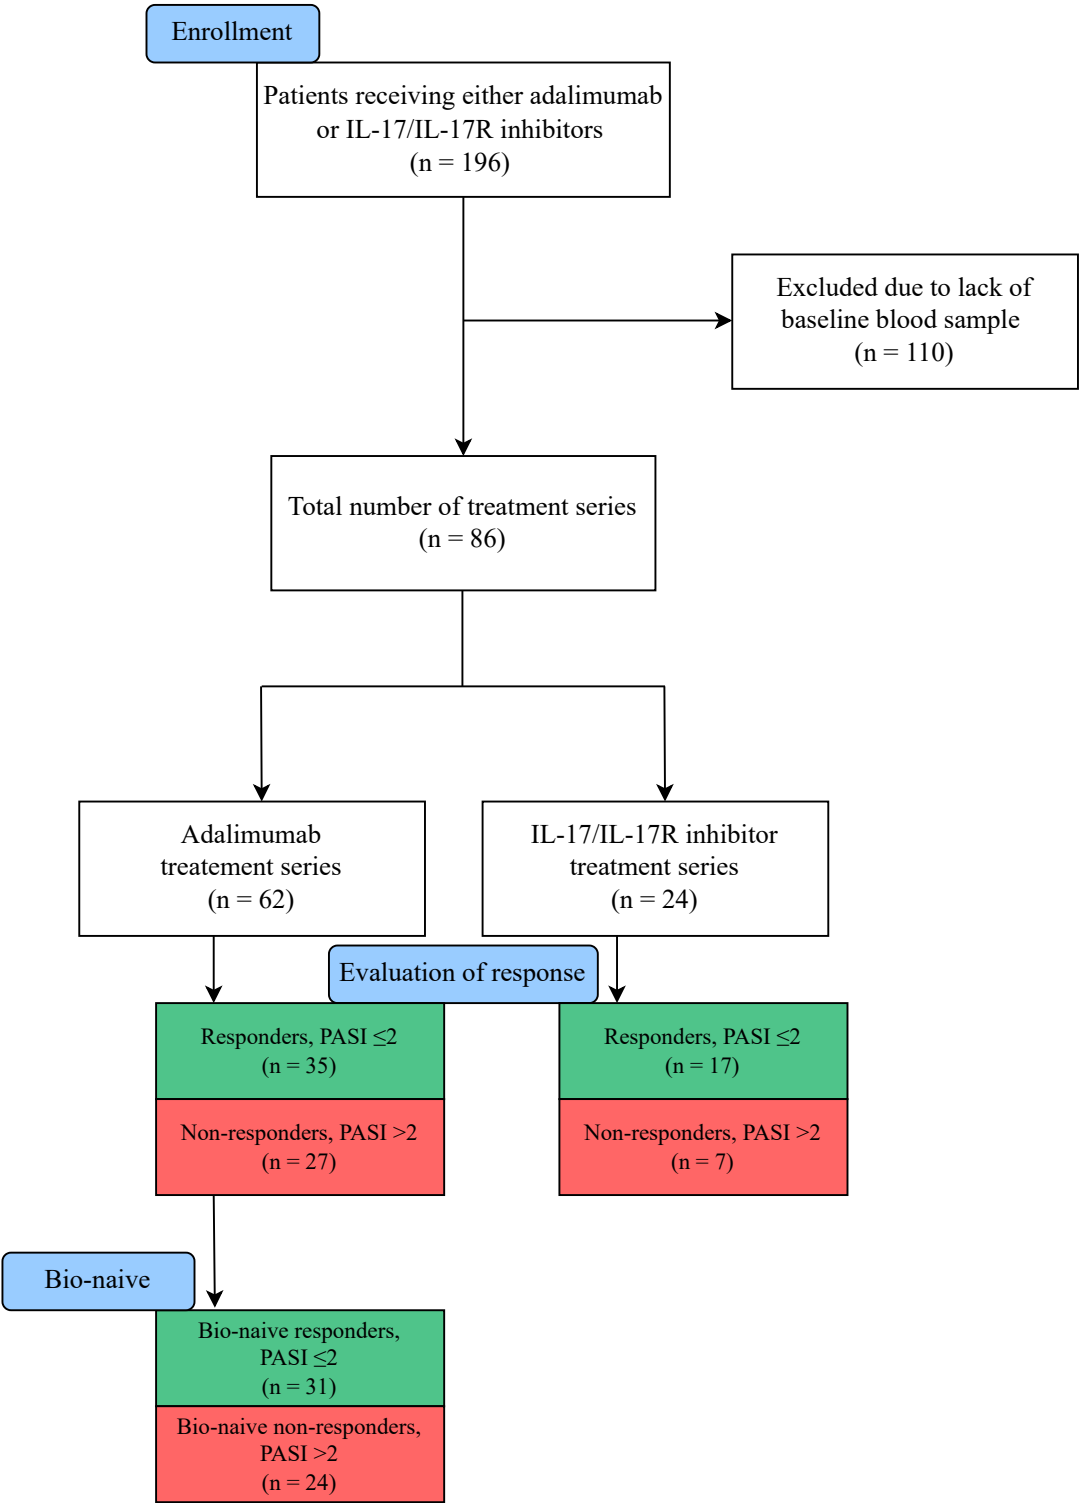

**Table S1:** Treatments included in the analysis of blood cell biomarkers of inflammation.

|                    | <b>TNF-<math>\alpha</math><br/>inhibitors</b> | <b>IL-17/IL-17R<br/>inhibitors</b> | <b>IL-23<br/>inhibitors</b> | <b>IL-12/23<br/>inhibitors</b> |
|--------------------|-----------------------------------------------|------------------------------------|-----------------------------|--------------------------------|
| Adalimumab         | 125                                           |                                    |                             |                                |
| Certolizumab pegol | 2                                             |                                    |                             |                                |
| Etanercept         | 1                                             |                                    |                             |                                |
| Infliximab         | 3                                             |                                    |                             |                                |
| Secukinumab        |                                               | 31                                 |                             |                                |
| Ixekizumab         |                                               | 21                                 |                             |                                |
| Brodalumab         |                                               | 13                                 |                             |                                |
| Ustekinumab        |                                               |                                    |                             | 37                             |
| Guselkumab         |                                               |                                    | 10                          |                                |
| Risankizumab       |                                               |                                    | 3                           |                                |
|                    |                                               |                                    |                             |                                |
| <b>Total</b>       | <b>131</b>                                    | <b>65</b>                          | <b>13</b>                   | <b>37</b>                      |

**Table S2:** Treatments included in the analysis of blood cytokines

|             | TNF- $\alpha$ inhibitors | IL-17/IL-17R inhibitors |
|-------------|--------------------------|-------------------------|
| Adalimumab  | 62                       |                         |
| Ixekizumab  |                          | 11                      |
| Brodalumab  |                          | 12                      |
| Secukinumab |                          | 1                       |
|             |                          |                         |
| Total       | 62                       | 24                      |

**Table S3:** Blood cell biomarkers of inflammation, numbers of responders and non-responders for different PASI definitions of response to each type of biologics

| Response definition                       | PASI $\leq$ 2 |                | PASI $\leq$ 4 |                |
|-------------------------------------------|---------------|----------------|---------------|----------------|
|                                           | Responders    | Non-responders | Responders    | Non-responders |
| <b>TNF-<math>\alpha</math> inhibitors</b> |               |                |               |                |
| Adalimumab                                | 71            | 54             | 103           | 22             |
| Infliximab                                | 0             | 3              | 2             | 1              |
| Certolizumab pegol                        | 1             | 1              | 1             | 1              |
| Etanercept                                | 1             | 0              | 1             | 0              |
| <i>Total</i>                              | <i>73</i>     | <i>58</i>      | <i>107</i>    | <i>24</i>      |
| <b>IL-12/23 inhibitors</b>                |               |                |               |                |
| Ustekinumab                               | 25            | 12             | 31            | 6              |
| <i>Total</i>                              | <i>25</i>     | <i>12</i>      | <i>31</i>     | <i>6</i>       |
| <b>IL-23 inhibitors</b>                   |               |                |               |                |
| Guselkumab                                | 4             | 6              | 5             | 5              |
| Risankizumab                              | 0             | 3              | 1             | 2              |
| <i>Total</i>                              | <i>4</i>      | <i>9</i>       | <i>6</i>      | <i>7</i>       |
| <b>IL-17 inhibitors</b>                   |               |                |               |                |
| Secukinumab                               | 29            | 2              | 31            | 0              |
| Ixekizumab                                | 14            | 7              | 19            | 2              |
| <i>Total</i>                              | <i>33</i>     | <i>9</i>       | <i>50</i>     | <i>2</i>       |
| <b>IL-17R inhibitors</b>                  |               |                |               |                |
| Brodalumab                                | 11            | 2              | 12            | 1              |
| <i>Total</i>                              | <i>11</i>     | <i>2</i>       | <i>12</i>     | <i>1</i>       |

**Table S4:** Blood cytokines, numbers of responders and non-responders for different PASI definitions of response to each type of biologics

| Response definition                       | <b>PASI<math>\leq</math>2</b> |                | <b>PASI<math>\leq</math>4</b> |                |
|-------------------------------------------|-------------------------------|----------------|-------------------------------|----------------|
|                                           | Responders                    | Non-responders | Responders                    | Non-responders |
| <b>TNF-<math>\alpha</math> inhibitors</b> |                               |                |                               |                |
| Adalimumab                                | 35                            | 27             | 49                            | 13             |
| <b>IL-17 inhibitors</b>                   |                               |                |                               |                |
| Secukinumab                               | 1                             | 0              | 1                             | 0              |
| Ixekizumab                                | 6                             | 5              | 10                            | 1              |
| <b>IL-17R inhibitors</b>                  |                               |                |                               |                |
| Brodalumab                                | 10                            | 2              | 11                            | 1              |

**Table S5:** Baseline characteristics and levels of blood cell biomarkers of inflammation. Response defined as a PASI ≤4.

|                                               | Responders                       | Bio-naive, responders            | Non-responders                    | Bio-naive, non-responders         |
|-----------------------------------------------|----------------------------------|----------------------------------|-----------------------------------|-----------------------------------|
| <b>TNF-α inhibitors*</b>                      |                                  |                                  |                                   |                                   |
| n                                             | 107                              | 90                               | 24                                | 18                                |
| Age, years, median (IQR)                      | 44 (32-54)                       | 44 (32-56)                       | 45 (33-61)                        | 47 (37-64)                        |
| Sex, female, n (%)                            | 31 (29)                          | 26 (29)                          | 8 (33)                            | 5 (28)                            |
| BMI, median (IQR)                             | 26.9 (24.3-31.3) <sup>a</sup>    | 26.9 (34.1-31.1)                 | 31.0 (24.6-34.5)                  | 30.0 (25.1-34.3)                  |
| Ever-smokers, n (%)                           | 50 (47) <sup>a</sup>             | 46 (51)                          | 17 (71)                           | 11 (61)                           |
| PsA, n (%)                                    | 22 (21) <sup>b</sup>             | 18 (20) <sup>c</sup>             | 9 (38) <sup>d</sup>               | 7 (39) <sup>e</sup>               |
| Baseline PASI, median (IQR)                   | 7.9 (4.8-11.8) <sup>e</sup>      | 8.1 (5.1-12.3)                   | 10.8 (8.5-12.9)                   | 11.0 (8.8-12.8)                   |
|                                               |                                  |                                  |                                   |                                   |
| Lymphocytes, 10 <sup>9</sup> /L, median (IQR) | 1.7 (1.3-2.1) <sup>f</sup>       | 1.7 (1.3-2.1) <sup>g</sup>       | 1.7 (1.4-2.5) <sup>a</sup>        | 1.6 (1.3-2.3)                     |
| Neutrophils, 10 <sup>9</sup> /L, median (IQR) | 3.9 (3.2-5.2) <sup>f</sup>       | 4.0 (3.2-5.2) <sup>g</sup>       | 4.2 (3.2-5.9) <sup>a</sup>        | 4.7 (3.0-5.9)                     |
| Platelets, 10 <sup>9</sup> /L, median (IQR)   | 252.0 (210.8-300.8) <sup>a</sup> | 253.0 (210.0-301.0) <sup>a</sup> | 261.0 (216.0-316.5) <sup>a</sup>  | 261.0 (218.0-387.0) <sup>a</sup>  |
| NLR, median (IQR)                             | 2.2 (1.8-3.1) <sup>f</sup>       | 2.2 (1.8-3.1) <sup>g</sup>       | 2.2 (1.6-3.49) <sup>a</sup>       | 2.5 (1.7-3.6)                     |
| PLR, median (IQR)                             | 149.6 (123.5-176.5) <sup>f</sup> | 150.3 (123.5-178.5) <sup>g</sup> | 144.8 (95.1-201.3) <sup>h</sup>   | 185.0 (121.7-221.0) <sup>a</sup>  |
| SII, 10 <sup>9</sup> /L, median (IQR)         | 580.7 (425.1-775.6) <sup>f</sup> | 585.2 (436.6-802.6) <sup>g</sup> | 524.7 (351.4-1161.5) <sup>h</sup> | 742.8 (369.2-1374.7) <sup>a</sup> |
|                                               |                                  |                                  |                                   |                                   |
| <b>IL-23/IL-12/23 inhibitors**</b>            | 37                               | 30                               | 13                                | 5                                 |
| n                                             |                                  |                                  |                                   |                                   |
| Age, years, median (IQR)                      | 38 (25-50)                       | 38 (24-46)                       | 50 (35-56)                        | 50 (36-50)                        |
| Sex, female, n (%)                            | 12 (32)                          | 11 (37)                          | 4 (31)                            | 1 (20)                            |
| BMI, median (IQR)                             | 25.4 (22.5-30.4)                 | 27.6 (23.4-30.2)                 | 30.0 (27.3-34.9)                  | 28.1 (25.1-30.0)                  |
| Ever-smokers, n (%)                           | 18 (49)                          | 14 (47)                          | 9 (69)                            | 3 (60)                            |
| PsA, n (%)                                    | 3 (8) <sup>i</sup>               | 2 (7) <sup>j</sup>               | 5 (38)                            | 1 (20)                            |
| Baseline PASI, median (IQR)                   | 9.3 (6.8-11.0)                   | 9.0 (7.1-10.5)                   | 12.6 (6.5-13.9)                   | 10.2 (6.5-12.3)                   |
|                                               |                                  |                                  |                                   |                                   |
| Lymphocytes, 10 <sup>9</sup> /L, median (IQR) | 1.7 (1.4-2.0) <sup>h</sup>       | 1.7 (1.4-2.0) <sup>a</sup>       | 1.5 (1.2-1.9) <sup>a</sup>        | 1.5 (1.4-1.5)                     |
| Neutrophils, 10 <sup>9</sup> /L, median (IQR) | 4.1 (3.2-5.6) <sup>h</sup>       | 3.9 (3.0-5.6) <sup>a</sup>       | 4.3 (3.0-5.6) <sup>a</sup>        | 3.1 (2.5-3.3)                     |
| Platelets, 10 <sup>9</sup> /L, median (IQR)   | 262.0 (232.0-341.0)              | 253.0 (219.2-278.0)              | 251.0 (220.0-263.0)               | 220.0 (220.0-255.0)               |
| NLR, median (IQR)                             | 2.5 (1.9-3.3) <sup>h</sup>       | 2.4 (1.9-2.9) <sup>a</sup>       | 2.4 (1.8-3.4) <sup>a</sup>        | 1.9 (1.6-2.1)                     |
| PLR, median (IQR)                             | 159.0 (139.2-206.0) <sup>h</sup> | 148.8 (121.4-179.5) <sup>a</sup> | 142.8 (98.8-184.1) <sup>a</sup>   | 143.8 (141.9-175.9)               |
| SII, 10 <sup>9</sup> /L, median (IQR)         | 640.2 (513.1-797.2) <sup>h</sup> | 584.3 (492.3-690.0) <sup>a</sup> | 514.6 (356.2-1025.9) <sup>a</sup> | 363.8 (333.5-545.2)               |
|                                               |                                  |                                  |                                   |                                   |
| <b>IL-17/IL-17R inhibitors***</b>             | 62                               | 24                               | 3                                 | 0                                 |

| n                                             |                                  |                     |                                  |   |
|-----------------------------------------------|----------------------------------|---------------------|----------------------------------|---|
| Age, years, median (IQR)                      | 44 (32-58)                       | 42 (31-51)          | 58 (55-67)                       | - |
| Sex, female, n (%)                            | 24 (39)                          | 8 (33)              | 1 (33)                           | - |
| BMI, median (IQR)                             | 26.5 (23.1-31.5)                 | 24.0 (21.3-29.1)    | 40.3 (37.8-45.0)                 | - |
| Ever-smokers, n (%)                           | 26 (43)                          | 9 (37)              | 3 (100)                          | - |
| PsA, n (%)                                    | 20 (32) <sup>k</sup>             | 6 (25) <sup>j</sup> | 1 (33)                           | - |
| Baseline PASI, median (IQR)                   | 9.0 (7.0-11.4) <sup>a</sup>      | 10.6 (7.5-13.6)     | 8.4 (6.8-11.7)                   | - |
|                                               |                                  |                     |                                  |   |
| Lymphocytes, 10 <sup>9</sup> /L, median (IQR) | 1.8 (1.4-1.9) <sup>e</sup>       | 1.7 (1.4-1.9)       | 2.5 (2.4-2.7) <sup>a</sup>       | - |
| Neutrophils, 10 <sup>9</sup> /L, median (IQR) | 4.0 (3.1-4.8) <sup>e</sup>       | 4.2 (3.2-4.8)       | 6.6 (6.4-6.9) <sup>a</sup>       | - |
| Platelets, 10 <sup>9</sup> /L, median (IQR)   | 261.0 (214.0-294.0) <sup>e</sup> | 252.5 (215.5-302.2) | 259.0 (242.0-275.5)              | - |
| NLR, median (IQR)                             | 2.3 (1.9-2.8) <sup>e</sup>       | 2.4 (2.0-3.1)       | 2.7 (2.4-2.9) <sup>a</sup>       | - |
| PLR, median (IQR)                             | 143.3 (114.1-184.9) <sup>e</sup> | 147.0 (122.8-196.0) | 109.6 (105.5-113.6) <sup>a</sup> | - |
| SII, 10 <sup>9</sup> /L, median (IQR)         | 562.1 (443.2-721.9) <sup>e</sup> | 702.7 (469.7-779.9) | 730.7 (678.1-783.3) <sup>a</sup> | - |

\*TNF- $\alpha$  inhibitors included adalimumab (n=125), infliximab (n= 3), certolizumab pegol (n=2) and etanercept (n=1). \*\*IL-23/IL-12/23 inhibitors included guselkumab (n=10), risankizumab (n=3) and ustekinumab (n=37). \*\*\*IL-17/IL-17R inhibitors included secukinumab (n=31), ixekizumab (n=21) and brodalumab (n=13). <sup>a</sup> missing data (n = 1), <sup>b</sup> missing data (n = 23), <sup>c</sup> missing data (n = 20), <sup>d</sup> missing data (n = 5), <sup>e</sup> missing data (n = 3), <sup>f</sup> missing data (n = 7), <sup>g</sup> missing data (n = 6), <sup>h</sup> missing data (n = 2), <sup>i</sup> missing data (n = 9), <sup>j</sup> missing data (n=8), <sup>k</sup> missing data (n=11). TNF, tumor necrosis factor; BMI, body mass index; PsA, psoriatic arthritis; PASI, psoriasis area and severity index; IL, interleukin; NLR, neutrophil-to-lymphocyte ratio; PLR, platelet-to-lymphocyte ratio; SII; systemic immune-inflammation index.



**Figure S3:** Blood cell biomarkers at baseline in responders (PASI  $\leq 4$ ) and non-responders (PASI  $> 4$ ) treated with either tumor necrosis factor (TNF)- $\alpha$  inhibitors, interleukin (IL)-23/IL-12/23 inhibitors, or IL-17/IL-17R inhibitors A) Neutrophil-to-lymphocyte ratio (NLR). B) Platelet-to-lymphocyte ratio (PLR). C) Systemic immune-inflammation index (SII). Responders = psoriasis area and severity index (PASI)  $\leq 4$  three months after treatment start. Non-responders = PASI  $> 4$  three months after treatment start. Ns = non-significant. \*  $p < 0.05$ .

**Figure S4:** Blood cell biomarkers at baseline in bio-naive responders (PASI  $\leq 4$ ) and non-responders (PASI  $> 4$ ) treated with either tumor necrosis factor (TNF)- $\alpha$  inhibitors or interleukin (IL)-23/IL-12/23 inhibitors. A) Neutrophil-to-lymphocyte ratio (NLR). B) Platelet-to-lymphocyte ratio (PLR). C) Systemic immune-inflammation index (SII). Responders = psoriasis area and severity index (PASI)  $\leq 4$  three months after treatment start. Non-responders = PASI  $> 4$  three months after treatment start. Ns = non-significant. \*  $p < 0.05$ .

Figure S3

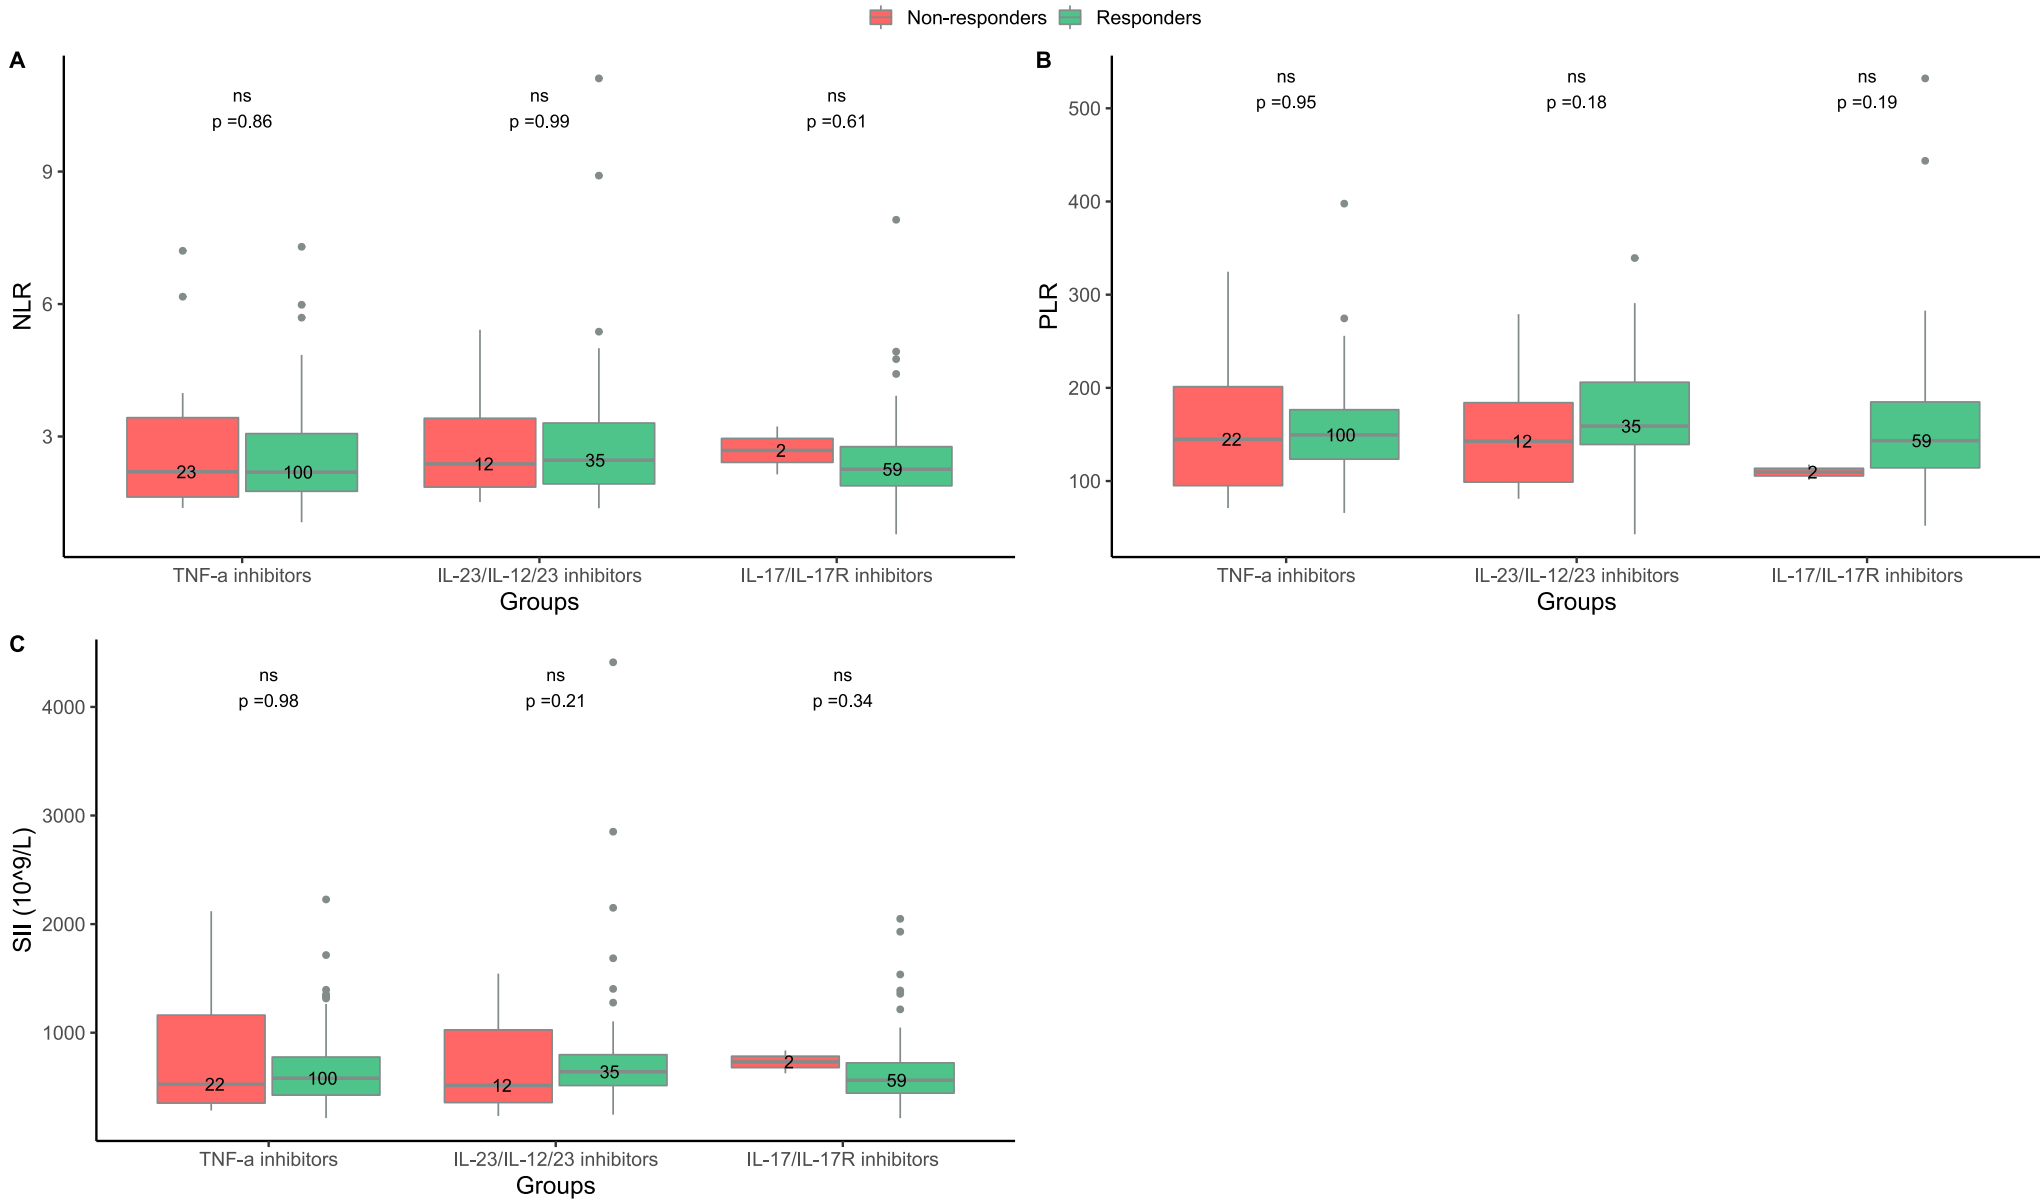

Figure S4

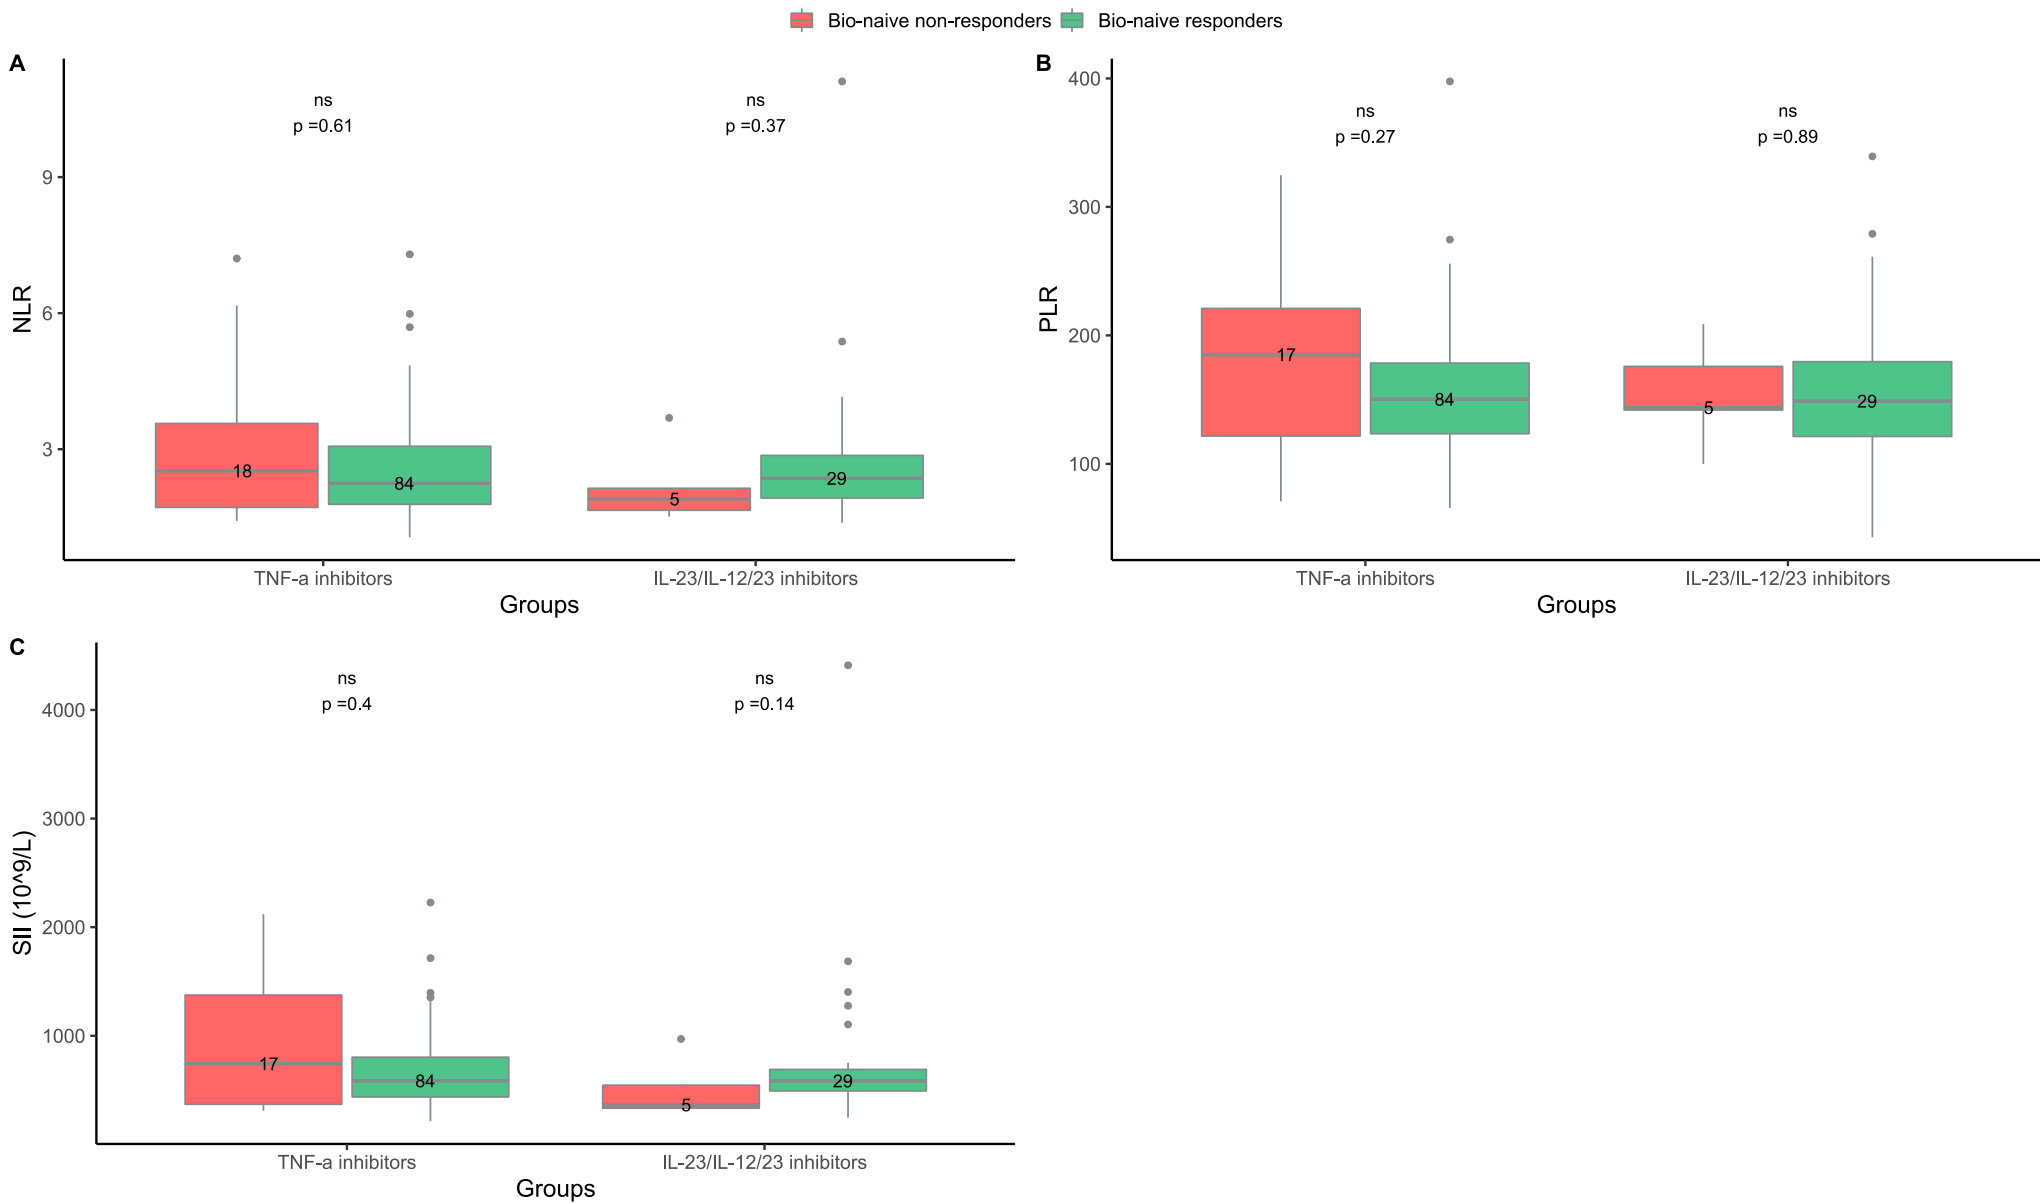

**Table S6:** Baseline characteristics and cytokine levels. Response defined as an absolute PASI  $\leq 4$ .

|                                     | Responders                    | Bio-naive, responders         | Non-responders                | Bio-naive, non-responders     |
|-------------------------------------|-------------------------------|-------------------------------|-------------------------------|-------------------------------|
| <b>Adalimumab</b>                   |                               |                               |                               |                               |
| n                                   | 49                            | 43                            | 13                            | 12                            |
| Age, years, median (IQR)            | 43 (32-55)                    | 42 (32-54)                    | 56 (44-67)                    | 55 (42-68)                    |
| Sex, female, n (%)                  | 16 (33)                       | 14 (33)                       | 2 (15)                        | 2 (17)                        |
| BMI, median (IQR)                   | 27.7 (24.4-31.6)              | 28.2 (25.6-32.0)              | 30.3 (24.4-34.3)              | 30.0 (24.1-34.7)              |
| Ever-smokers, n (%)                 | 22 (46) <sup>a</sup>          | 19 (44) <sup>a</sup>          | 8 (62)                        | 7 (58)                        |
| PsA, n (%)                          | 7 (14)                        | 6 (14)                        | 5 (38)                        | 4 (33)                        |
| Baseline PASI, median (IQR)         | 8.2 (4.5-11.9)                | 9.2 (4.9-13.8)                | 11.4 (9.4-12.6)               | 10.7 (9.1-12.4)               |
|                                     |                               |                               |                               |                               |
| TNF- $\alpha$ , pg/mL, median (IQR) | 3.89 (2.55-5.20) <sup>b</sup> | 3.66 (2.55-5.20) <sup>c</sup> | 6.62 (4.97-8.85) <sup>d</sup> | 6.43 (4.87-9.35) <sup>d</sup> |
| IL-6, pg/mL, median (IQR)           | 1.01 (0.59-1.65) <sup>d</sup> | 1.04 (0.63-1.64) <sup>d</sup> | 1.86 (1.17-4.09)              | 1.78 (1.13-2.86)              |
| sIL-6ST, ng/mL, median (IQR)        | 123.19 (96.36-147.56)         | 123.34 (96.91-146.86)         | 137.51 (116.79-152.51)        | 130.44 (114.78-149.03)        |
| sIL-6R, ng/mL, median (IQR)         | 31.46 (26.92-43.06)           | 32.06 (26.31-43.99)           | 39.63 (32.03-45.64)           | 38.25 (31.96-42.94)           |
|                                     |                               |                               |                               |                               |
| <b>IL-17/IL-17R inhibitors*</b>     |                               |                               |                               |                               |
| n                                   | 22                            | 0                             | 2                             | 0                             |
| Age, years, median (IQR)            | 53 (42-60)                    | -                             | 63 (57-69)                    | -                             |
| Sex, female, n (%)                  | 9 (41)                        | -                             | 0 (0)                         | -                             |
| BMI, median (IQR)                   | 28.5 (24.6-33.3)              | -                             | 40.5 (38.5-42.4)              | -                             |
| Ever-smokers, n (%)                 | 14 (63)                       | -                             | 2 (100)                       | -                             |
| PsA, n (%)                          | 6 (27)                        | -                             | 0 (0)                         | -                             |
| Baseline PASI, median (IQR)         | 7.1 (5.2-9.0)                 | -                             | 11.8 (10.1-13.4)              | -                             |
|                                     |                               |                               |                               |                               |
| TNF- $\alpha$ , pg/mL, median (IQR) | 4.21 (2.74-9.06) <sup>e</sup> | -                             | 1.88 (1.69-2.06)              | -                             |
| IL-6, pg/mL, median (IQR)           | 1.04 (0.73-4.15) <sup>e</sup> | -                             | 2.65 (2.00-3.20)              | -                             |
| sIL-6ST, ng/mL, median (IQR)        | 115.50 (105.83-155.81)        | -                             | 126.80 (113.60-139.99)        | -                             |
| sIL-6R, ng/mL, median (IQR)         | 33.34 (29.19-38.25)           | -                             | 27.25 (22.27-32.24)           | -                             |

\*IL-17/IL-17R inhibitors included secukinumab (n=1), ixekizumab (n=11) and brodalumab (n=12). <sup>a</sup> Missing data (n=1), <sup>b</sup> samples below detection limit (n=4), <sup>c</sup> samples below detection limit (n=2), <sup>d</sup> samples below detection limit (n=3), <sup>e</sup> samples below detection limit (n=1). TNF, tumor-necrosis factor; BMI, body mass index; PsA, psoriatic arthritis; PASI, psoriasis area and severity index; IL, interleukin; sIL-6ST, interleukin-6 signal transducer; sIL-6R, interleukin-6 receptor.

**Figure S5:** Blood cytokine levels at baseline in responders (PASI  $\leq 4$ ) and non-responders (PASI  $> 4$ ) to treatment with adalimumab or interleukin (IL)-17/IL-17R inhibitors. A) Tumor necrosis factor-alpha (TNF)- $\alpha$ . B) Soluble interleukin-6 signal transducer (sIL-6ST). C) Interleukin-6 (IL-6). D) Soluble interleukin-6 receptor (sIL-6R). Responders = psoriasis area and severity index (PASI)  $\leq 4$  three months after treatment start. Non-responders = PASI  $> 4$  three months after treatment start. Ns = non-significant. \*  $p < 0.05$ .

**Figure S6:** Blood cytokine levels at baseline in bio-naïve responders (PASI  $\leq 4$ ) and non-responders (PASI  $> 4$ ) to treatment with adalimumab. A) Tumor necrosis factor-alpha (TNF)- $\alpha$ . B) Soluble interleukin-6 signal transducer (sIL-6ST). C) Interleukin-6 (IL-6). D) Soluble interleukin-6 receptor (sIL-6R). Responders = psoriasis area and severity index (PASI)  $\leq 4$  three months after treatment start. Non-responders = PASI  $> 4$  three months after treatment start. Ns = non-significant. \*  $p < 0.05$ .

Figure S5

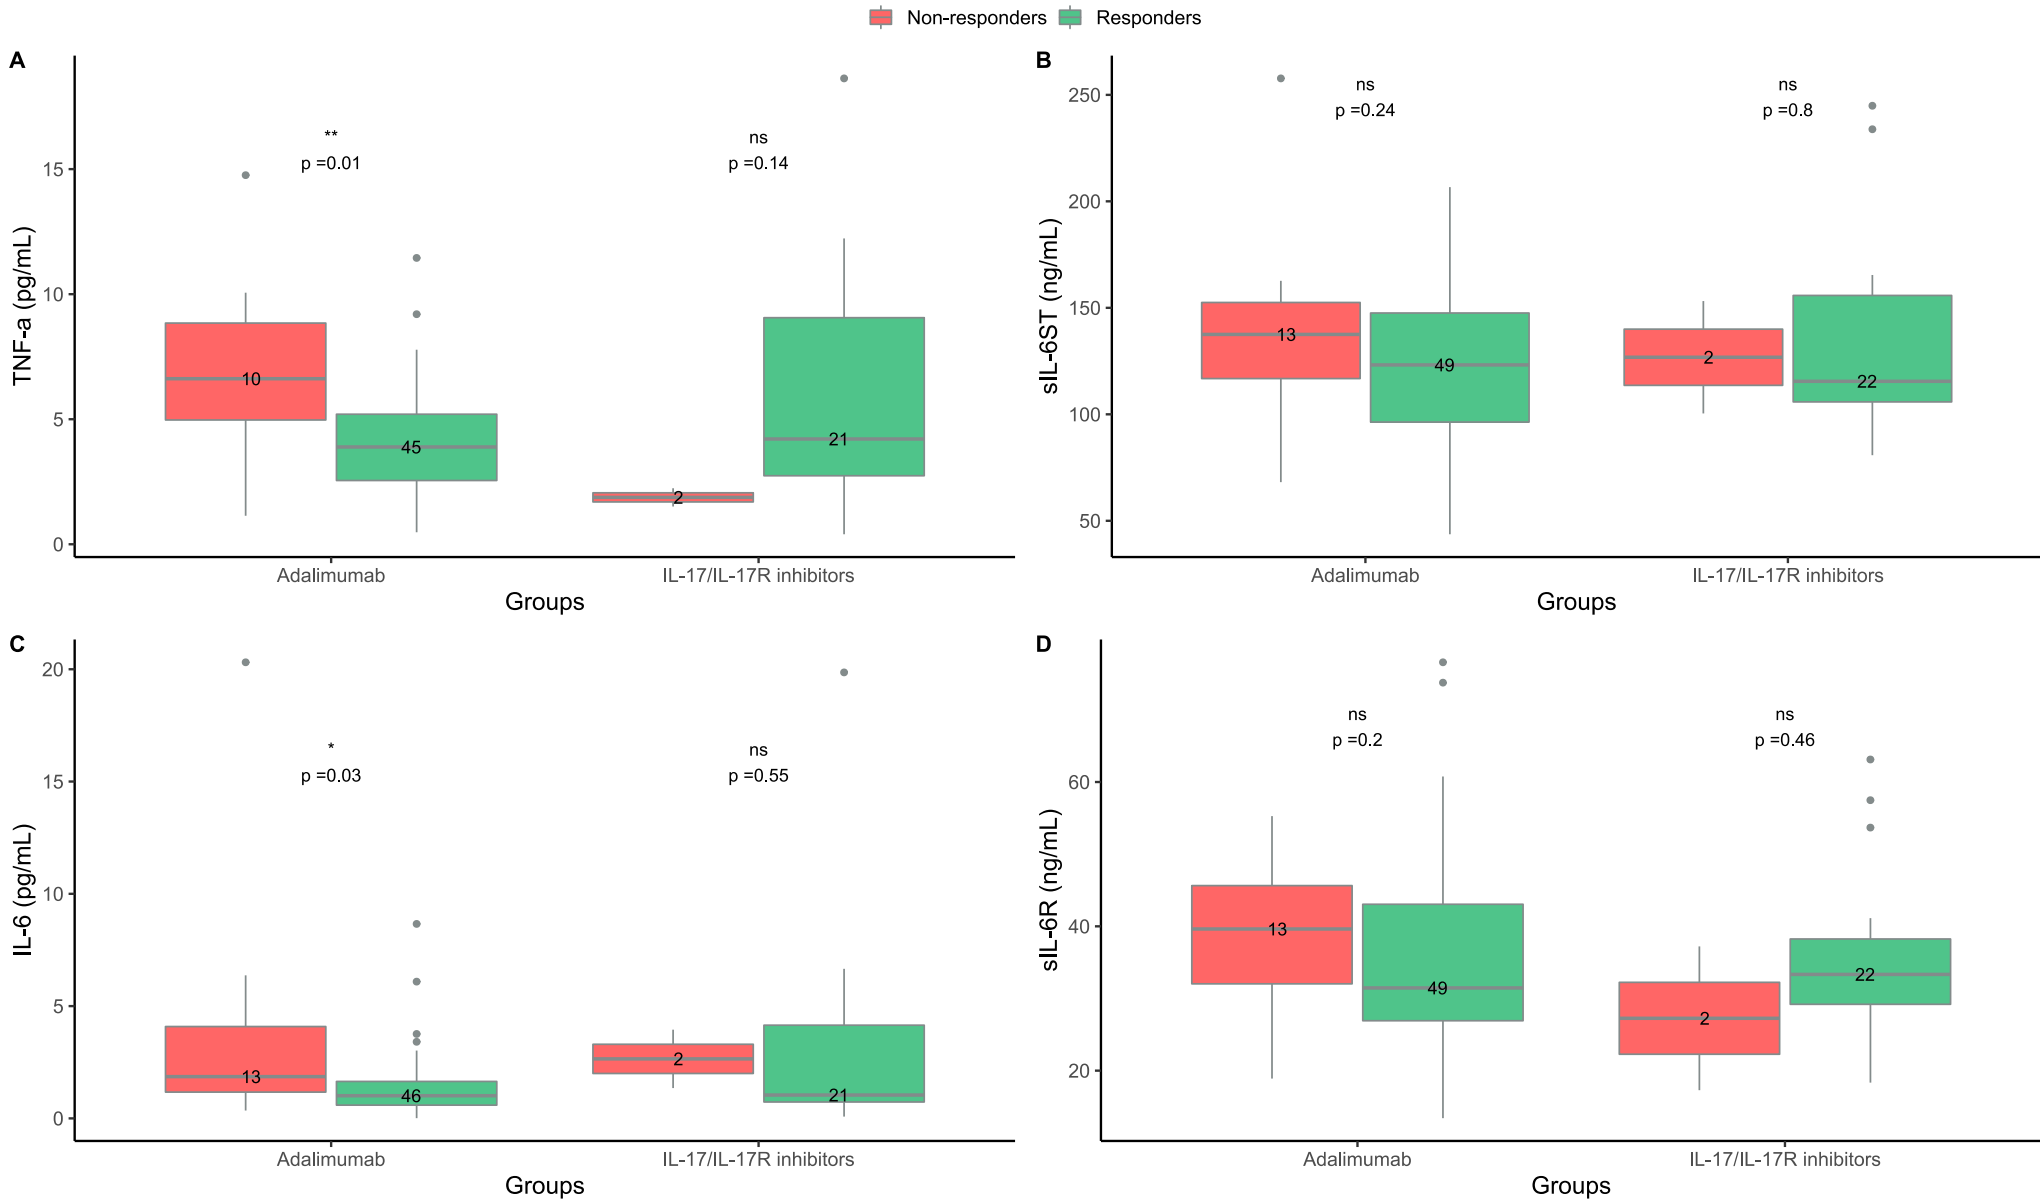

Figure S6

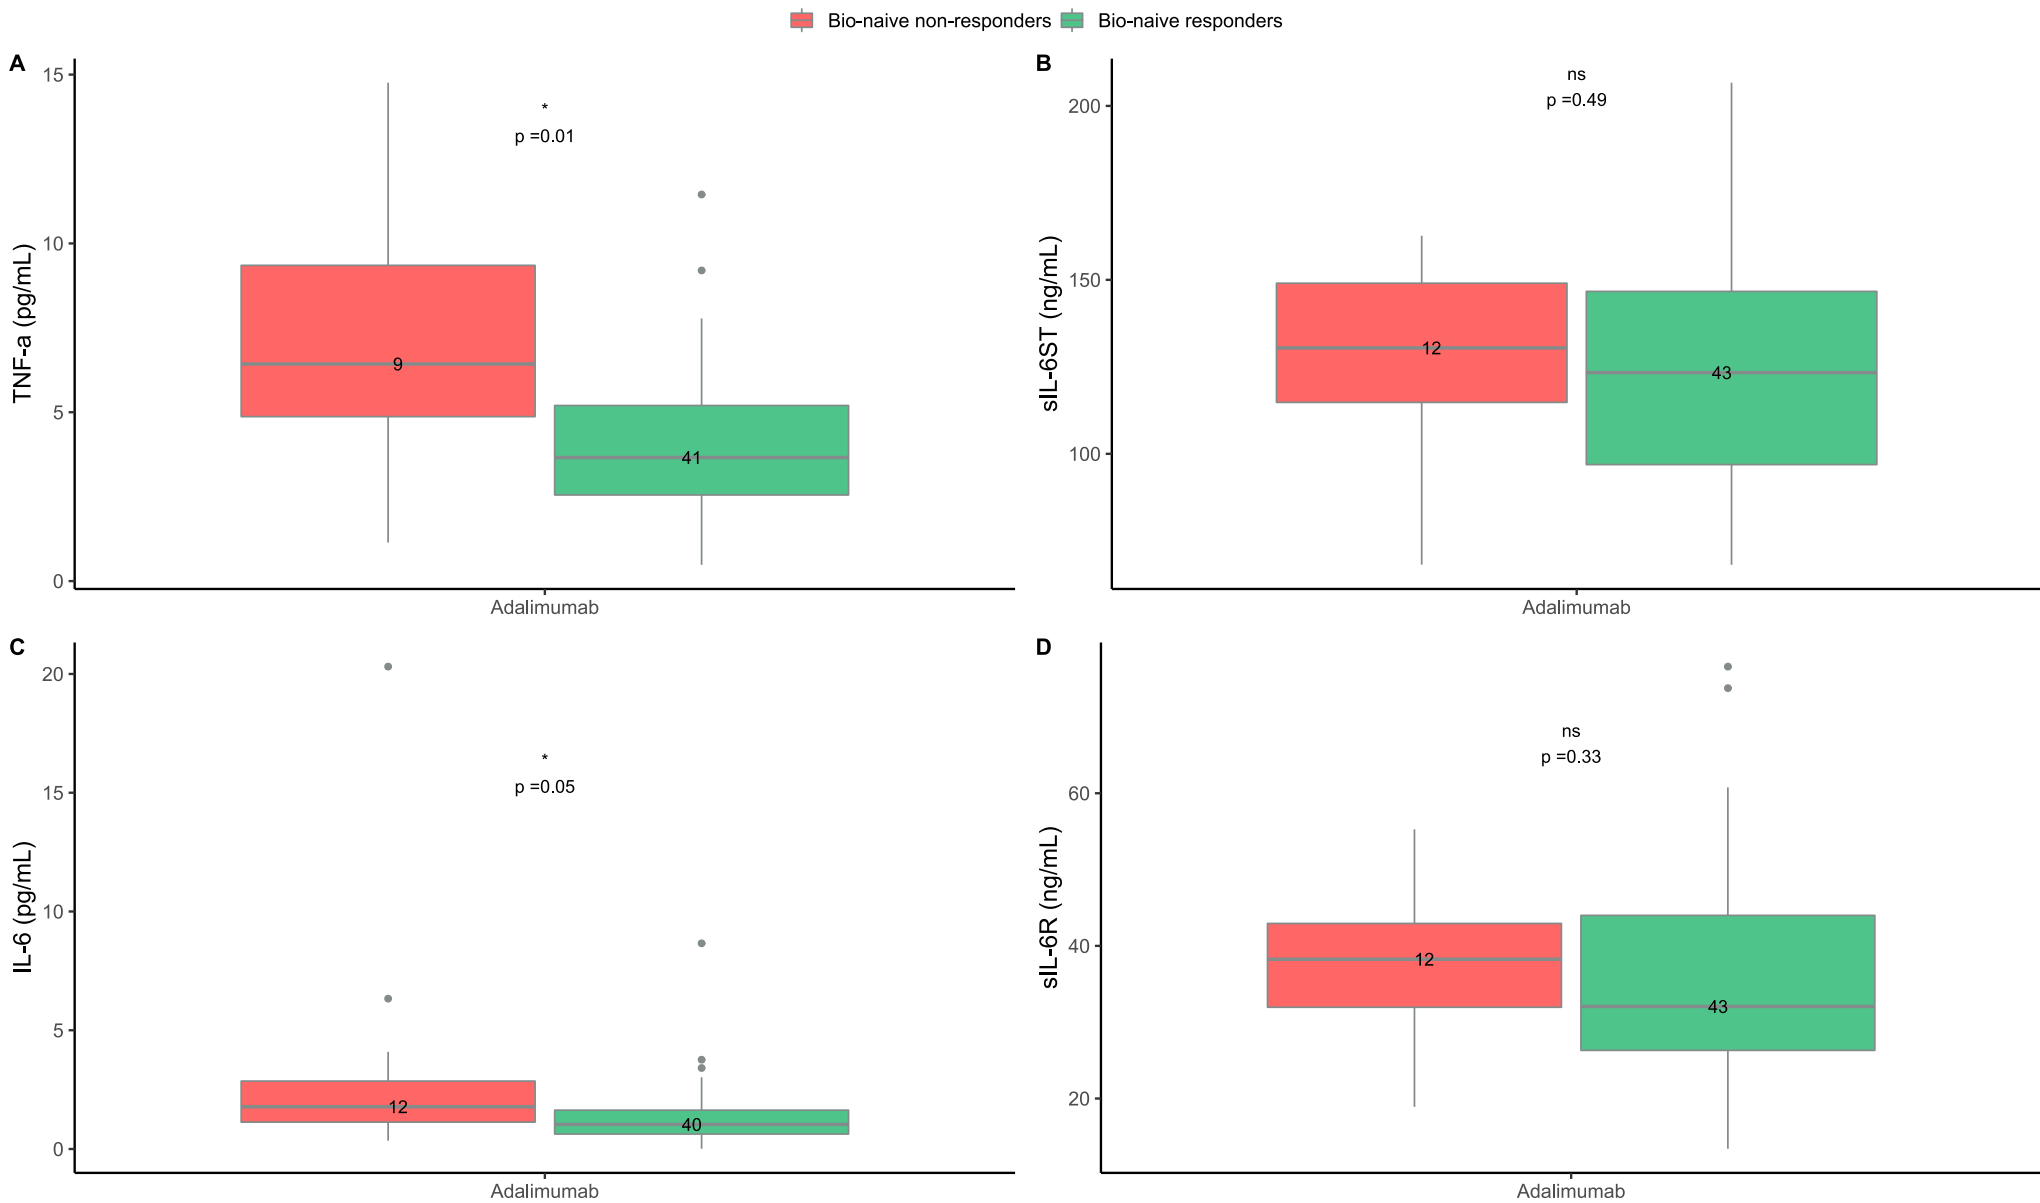

Supplement: s1 [file s1]
